# Supplementary material for: “Virtual Surf Booth”: Assessment of a Novel Tool and Data Collection Process to Measure the Impact of a 6-Week Surf Programme on Mental Wellbeing
Source: Int J Environ Res Public Health. 2022 Dec 13;19(24):16732. doi: 10.3390/ijerph192416732 (PMC9779844; doi:10.3390/ijerph192416732)

Supplementary File S2 – SWEMWBS – descriptive statistics, paired-samples t-test and Wilcoxon signed-rank test analysis.

| Descriptive statistics                                        |                     |                    |        |                  |                                   |                                   |
|---------------------------------------------------------------|---------------------|--------------------|--------|------------------|-----------------------------------|-----------------------------------|
|                                                               | Before intervention | After intervention | Change | Positive change? | Statistically significant change? | Wilcoxon signed rank test P value |
| <b>Total no. of responses</b>                                 | 11                  | 12                 |        |                  |                                   |                                   |
| <b>% Low wellbeing</b>                                        | 27%                 | 8%                 |        |                  |                                   |                                   |
| <b>% Moderate wellbeing</b>                                   | 64%                 | 58%                |        |                  |                                   |                                   |
| <b>% High wellbeing</b>                                       | 9%                  | 33%                |        |                  |                                   |                                   |
| <b>Mean score</b>                                             | 24.3                | 29                 | 4.60   | Yes              | Yes                               | p<0.05                            |
| <b>Standard deviation</b>                                     | 6.9                 | 4.0                | 3.8    |                  |                                   |                                   |
| <b>By age</b>                                                 |                     |                    |        |                  |                                   |                                   |
| 25-39                                                         | 20.0                | 26.5               | 6.50   | Yes              |                                   |                                   |
| 40-54                                                         | 26.7                | 29.5               | 2.79   | Yes              |                                   |                                   |
| <b>Number of people with a meaningful positive change (%)</b> |                     |                    |        | 6                | 60.0                              | %                                 |
| <b>Number of people with a meaningful negative change (%)</b> |                     |                    |        | 0                | 0.0                               | %                                 |

## Descriptive statistics

|                               | I've been feeling optimistic about the future | I've been feeling useful | I've been feeling relaxed | I've been dealing with problems well | I've been thinking clearly | I've been feeling close to other people | I've been able to make up my mind about things |  | Total SWEMWBS score change | Positive change? | Statistically significant change? | Wilcoxon signed rank test P value |
|-------------------------------|-----------------------------------------------|--------------------------|---------------------------|--------------------------------------|----------------------------|-----------------------------------------|------------------------------------------------|--|----------------------------|------------------|-----------------------------------|-----------------------------------|
|                               | 1                                             | 2                        | 3                         | 6                                    | 7                          | 9                                       | 11                                             |  |                            |                  |                                   |                                   |
| <b>Total no. of responses</b> | 12                                            | 12                       | 12                        | 12                                   | 12                         | 12                                      | 12                                             |  |                            |                  |                                   |                                   |
| <b>Mean change</b>            | 0.09                                          | 0.35                     | 1.11                      | 0.66                                 | 0.64                       | 0.78                                    | 0.61                                           |  | 4.60                       | Yes              | Yes                               | p<0.05                            |

### Wilcoxon signed rank test

|                | n    | Sum |
|----------------|------|-----|
| Positive ranks | 8    | 52  |
| Total number   | 10   |     |
| U <sub>R</sub> | 27.5 |     |
| SD             | 9.81 |     |
| z              | 2.50 |     |
| Significance   | Yes  |     |

### Paired t test

|        |       |
|--------|-------|
| Mean   | 3.870 |
| SD     | 2.898 |
| SE (d) | 0.916 |
| t      | 4.223 |
| df     | 9     |

|                    | Before | After |
|--------------------|--------|-------|
| Mean SWEMWBS score | 24.3   | 28.5  |

|                      | Before | After |
|----------------------|--------|-------|
| % Low wellbeing      | 27%    | 8%    |
| % Moderate wellbeing | 64%    | 58%   |
| % High wellbeing     | 9%     | 33%   |

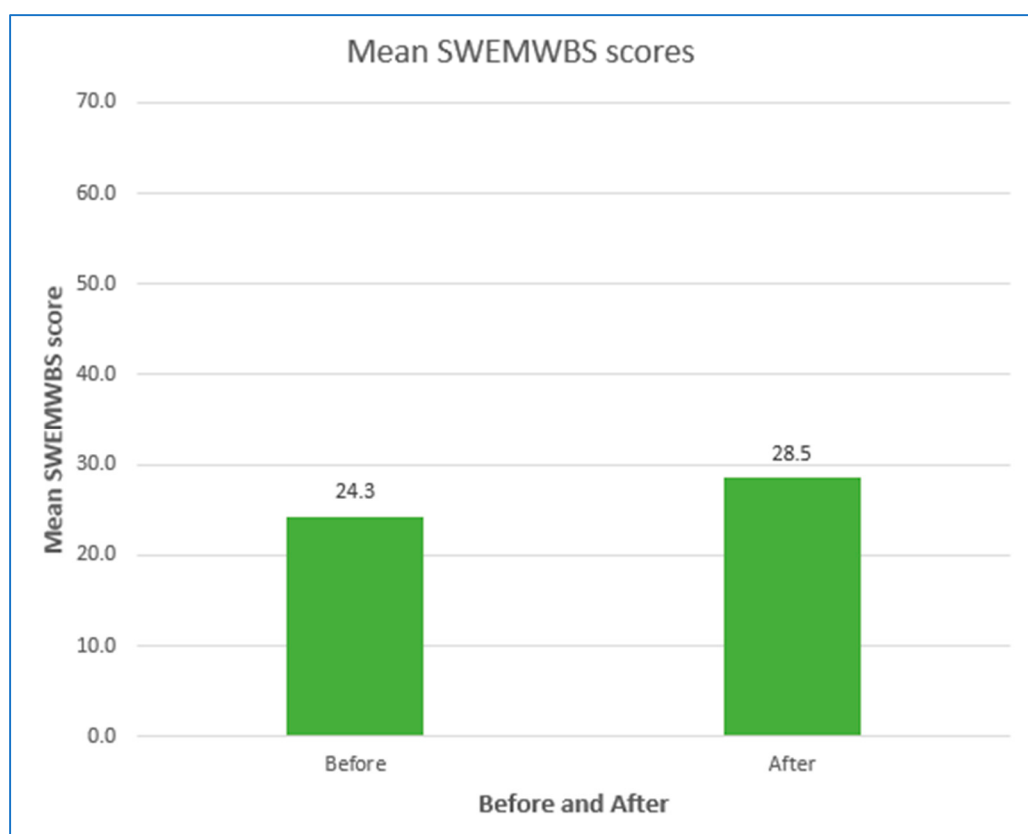

**Proportions of wellbeing before & after intervention**

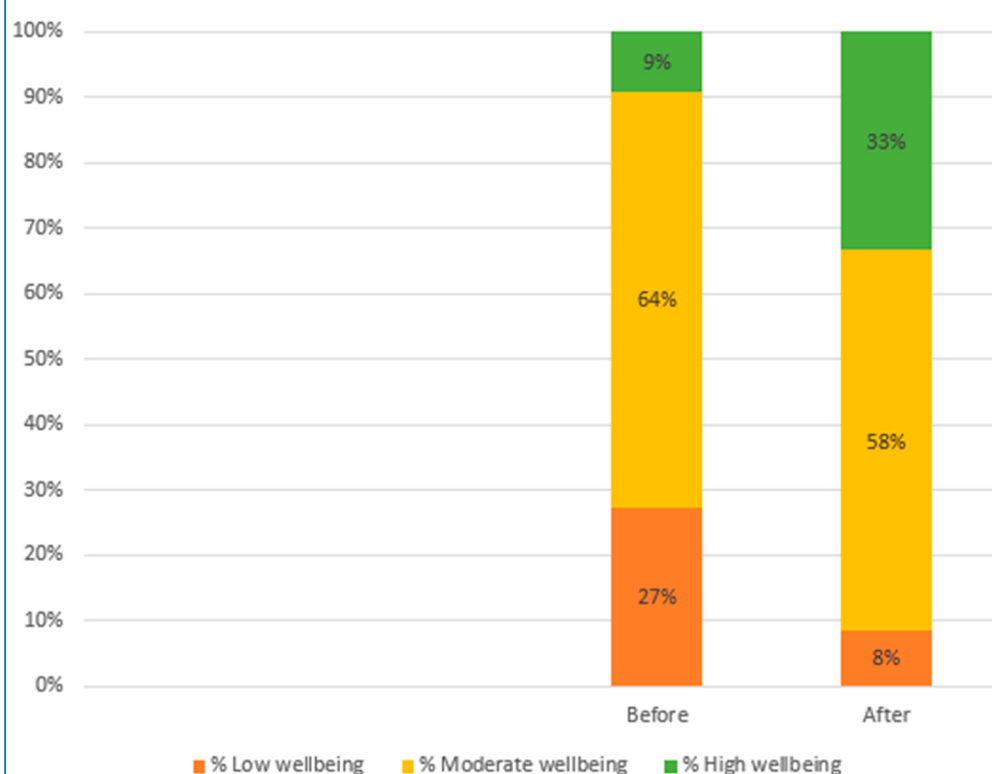

Supplement: Supplementary file 1 [file ijerph-19-16732-s001.zip › Supplementary File S2_SWEMWBS outputs.pdf]
