# Supplementary material for: “Virtual Surf Booth”: Assessment of a Novel Tool and Data Collection Process to Measure the Impact of a 6-Week Surf Programme on Mental Wellbeing
Source: Int J Environ Res Public Health. 2022 Dec 13;19(24):16732. doi: 10.3390/ijerph192416732 (PMC9779844; doi:10.3390/ijerph192416732)
Supplement: Supplementary file 1 [file ijerph-19-16732-s001.zip]

Archive with 4 entries (4 files):
- Supplementary File S1_tool screenshots_revised.pdf
- Supplementary File S2_SWEMWBS outputs.pdf
- Supplementary File S3_weather_conditions.pdf
- Supplementary File S4_focus groups interview guides.pdf
