# Supplementary material for: “Virtual Surf Booth”: Assessment of a Novel Tool and Data Collection Process to Measure the Impact of a 6-Week Surf Programme on Mental Wellbeing
Source: Int J Environ Res Public Health. 2022 Dec 13;19(24):16732. doi: 10.3390/ijerph192416732 (PMC9779844; doi:10.3390/ijerph192416732)
Supplement: Supplementary file 1 [file ijerph-19-16732-s001.zip › Supplementary File S3_weather_conditions.pdf]

**Supplementary File S3 - weather conditions during the sessions.**

| <b>Session</b>  | <b>Date</b>                    | <b>Weather conditions</b>                                                                   |
|-----------------|--------------------------------|---------------------------------------------------------------------------------------------|
| 1 <sup>st</sup> | 25 <sup>th</sup> of May, 2022  | Cloudy, bright, approx. 15°C, evolving towards partly sunny and windy (maximum gust 25 mph) |
| 2 <sup>nd</sup> | 8 <sup>th</sup> of June, 2022  | Sunny, approx. 17°C                                                                         |
| 3 <sup>rd</sup> | 15 <sup>th</sup> of June 2022  | Sunny, approx. 20°C                                                                         |
| 4 <sup>th</sup> | 22 <sup>nd</sup> of June, 2022 | Sunny, approx. 23°C                                                                         |
| 5 <sup>th</sup> | 29 <sup>th</sup> of June, 2022 | Partly sunny, partly cloudy, drizzling, approx. 17°C, evolving towards rainy                |
| 6 <sup>th</sup> | 6 <sup>th</sup> of July, 2022  | Sunny, 20°C                                                                                 |
